# Supplementary material for: Effects of replacing thiophene with 5,5-dimethylcyclopentadiene in alternating poly(phenylene), poly(3-hexylthiophene), and poly(fluorene) copolymer derivatives
Source: Royal Society of Chemistry journal article supplement (doi:10.1039/c5py01247c), 2015-01-01
Supplement: c5py01247c1.pdf [file c5py01247c1.pdf]

Electronic Supplementary Information

**Effects of Replacing Thiophene with 5,5-Dimethylcyclopentadiene in Alternating Poly(phenylene), Poly(3-hexylthiophene), and Poly(fluorene) Copolymer Derivatives**

L. Chen,<sup>a</sup> K. Wang,<sup>a</sup> S. M. Mahmoud,<sup>a</sup> Y. Li,<sup>b</sup> H. Huang,<sup>b</sup> W. Huang,<sup>b</sup> J. Xu,<sup>b</sup> C. Dun,<sup>b</sup> D. Carroll,<sup>b</sup> and A. Pietrangelo<sup>\*a</sup>

<sup>a</sup> *Department of Chemistry, Rutgers University-Newark, 73 Warren Street, Newark, New Jersey 07102, USA.*

<sup>b</sup> *Center for Nanotechnology and Molecular Materials, Department of Physics, Wake Forest, Winston-Salem, NC 27109, USA*

Email: [a.pietrangelo@rutgers.edu](mailto:a.pietrangelo@rutgers.edu)

## **Table of Contents**

|                                                                                                                                                                                                                                                         |    |
|---------------------------------------------------------------------------------------------------------------------------------------------------------------------------------------------------------------------------------------------------------|----|
| Figure S 1. GPC traces of PPCp with UV detector (red dash) and refractive index detector (black solid). .....                                                                                                                                           | 4  |
| Figure S 2. GPC traces of PPT with UV detector (red dash) and refractive index detector (black solid). .....                                                                                                                                            | 4  |
| Figure S 3. GPC traces of P3HTCp with UV detector (red dash) and refractive index detector (black solid). .....                                                                                                                                         | 5  |
| Figure S 4. GPC traces of P3HTT with UV detector (red dash) and refractive index detector (black solid). .....                                                                                                                                          | 5  |
| Figure S 5. <sup>1</sup> H NMR spectrum of PPCp (500 MHz, CD <sub>2</sub> Cl <sub>2</sub> ).....                                                                                                                                                        | 6  |
| Figure S 6. <sup>1</sup> H NMR spectrum of PPT (500 MHz, CD <sub>2</sub> Cl <sub>2</sub> ). .....                                                                                                                                                       | 6  |
| Figure S 7. <sup>1</sup> H NMR spectrum of P3HTCp (500 MHz, CD <sub>2</sub> Cl <sub>2</sub> ). .....                                                                                                                                                    | 7  |
| Figure S 8. <sup>1</sup> H NMR spectrum of P3HTT (500 MHz, CD <sub>2</sub> Cl <sub>2</sub> ). .....                                                                                                                                                     | 7  |
| Figure S 9. MALDI-TOF mass spectrum of PPT. ....                                                                                                                                                                                                        | 8  |
| Figure S 10. MALDI-TOF mass spectrum of P3HTT. ....                                                                                                                                                                                                     | 8  |
| Figure S 11. UV/vis absorption spectra of PPT in CHCl <sub>3</sub> /MeOH solvent mixtures. ....                                                                                                                                                         | 9  |
| Figure S 12. Excitation (blue, em. @ 550 nm) and emission (red, exc. @ 365 nm) spectra of PPCp. ....                                                                                                                                                    | 9  |
| Figure S 13. Excitation (blue, em. @ 517 nm) and emission (red, exc. @ 454 nm) spectra of PPCp. ....                                                                                                                                                    | 10 |
| Figure S 14. Excitation (blue, em. @ ca. 600 nm) and emission (red, exc. @ ca. 476 nm) spectra of P3HTCp. ....                                                                                                                                          | 10 |
| Figure S 15. Excitation (blue, em. @ ca. 564 nm) and emission (red, exc. @ ca. 457 nm) spectra of P3HTCp. ....                                                                                                                                          | 11 |
| Figure S 16. TGA thermograms of PPT and PPCp. ....                                                                                                                                                                                                      | 11 |
| Figure S 17. TGA thermograms of P3HTT and P3HTCp. ....                                                                                                                                                                                                  | 12 |
| Figure S 18. TGA thermograms of PFT and PFCp. ....                                                                                                                                                                                                      | 12 |
| Figure S 19. DSC thermograms of PPT and PPCp. ....                                                                                                                                                                                                      | 13 |
| Figure S 20. DSC thermograms of P3HTT and P3HTCp. ....                                                                                                                                                                                                  | 13 |
| Figure S 21. DSC thermograms of PFT and PFCp. ....                                                                                                                                                                                                      | 14 |
| Figure S 22. Cyclic voltammogram of PFCp [5.6 mM (based on repeat unit Mw)].<br>Conditions: 0.1 M [ <i>n</i> -Bu <sub>4</sub> N]PF <sub>6</sub> in DCM; scan rate, 100 mV/s, Pt disc working electrode, <i>E</i> vs. FeCp*/ FeCp* <sup>+</sup> . ....   | 14 |
| Figure S 23. Cyclic voltammogram of PFT [5.6 mM (based on repeat unit Mw)].<br>Conditions: 0.1 M [ <i>n</i> -Bu <sub>4</sub> N]PF <sub>6</sub> in DCM; scan rate, 100 mV/s, Pt disc working electrode, <i>E</i> vs. FeCp*/ FeCp* <sup>+</sup> . ....    | 15 |
| Figure S 24. Cyclic voltammogram of PPCp [5.6 mM (based on repeat unit Mw)].<br>Conditions: 0.1 M [ <i>n</i> -Bu <sub>4</sub> N]PF <sub>6</sub> in DCM; scan rate, 100 mV/s, Pt disc working electrode, <i>E</i> vs. FeCp*/ FeCp* <sup>+</sup> . ....   | 15 |
| Figure S 25. Cyclic voltammogram of PPT [5.6 mM (based on repeat unit Mw)].<br>Conditions: 0.1 M [ <i>n</i> -Bu <sub>4</sub> N]PF <sub>6</sub> in DCM; scan rate, 100 mV/s, Pt disc working electrode, <i>E</i> vs. FeCp*/ FeCp* <sup>+</sup> . ....    | 16 |
| Figure S 26. Cyclic voltammogram of P3HTCp [5.6 mM (based on repeat unit Mw)].<br>Conditions: 0.1 M [ <i>n</i> -Bu <sub>4</sub> N]PF <sub>6</sub> in DCM; scan rate, 100 mV/s, Pt disc working electrode, <i>E</i> vs. FeCp*/ FeCp* <sup>+</sup> . .... | 16 |

|                                                                                                                                                                                                                                                                                                                                    |    |
|------------------------------------------------------------------------------------------------------------------------------------------------------------------------------------------------------------------------------------------------------------------------------------------------------------------------------------|----|
| Figure S 27. Cyclic voltammogram of P3HTT [5.6 mM (based on repeat unit Mw)].<br>Conditions: 0.1 M [ <i>n</i> -Bu <sub>4</sub> N]PF <sub>6</sub> in DCM; scan rate, 100 mV/s, Pt disc working<br>electrode, <i>E</i> vs. FeCp <sup>*</sup> / FeCp <sup>*+</sup> . .....                                                            | 17 |
| Figure S 28. Spectroelectrochemical profile of P3HTT between 0.80 and 1.00 V (vs<br>Ag/Ag <sup>+</sup> ). The black spectrum was obtained from a film in the neutral state. All<br>subsequent spectra ( <i>i.e.</i> , red, blue, green, pink, and brown) were taken at<br>progressively higher potentials at 50 mV intervals. .... | 17 |
| Figure S 29. HSQC spectrum of 3 (500 MHz, CD <sub>2</sub> Cl <sub>2</sub> ). .....                                                                                                                                                                                                                                                 | 18 |
| Figure S 30. HMBC spectrum of 3 (500 MHz, CD <sub>2</sub> Cl <sub>2</sub> ). .....                                                                                                                                                                                                                                                 | 19 |
| Figure S 31. HSQC spectrum of 4 (500 MHz, CD <sub>2</sub> Cl <sub>2</sub> ). .....                                                                                                                                                                                                                                                 | 20 |
| Figure S 32. HMBC spectrum of 4 (500 MHz, CD <sub>2</sub> Cl <sub>2</sub> ). .....                                                                                                                                                                                                                                                 | 21 |
| Figure S 33. HSQC spectrum of 5 (500 MHz, CD <sub>2</sub> Cl <sub>2</sub> ). .....                                                                                                                                                                                                                                                 | 22 |
| Figure S 34. HMBC spectrum of 4 (500 MHz, CD <sub>2</sub> Cl <sub>2</sub> ). .....                                                                                                                                                                                                                                                 | 23 |

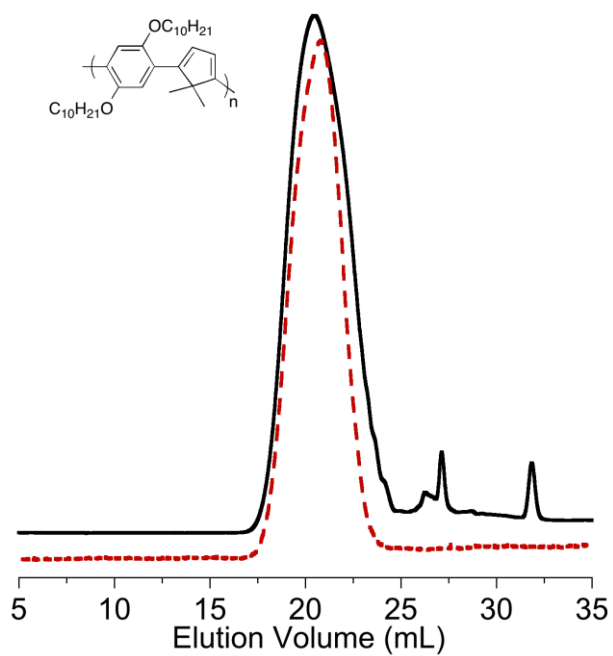

**Figure S 1.** GPC traces of **PPCp** with UV detector (red dash) and refractive index detector (black solid).

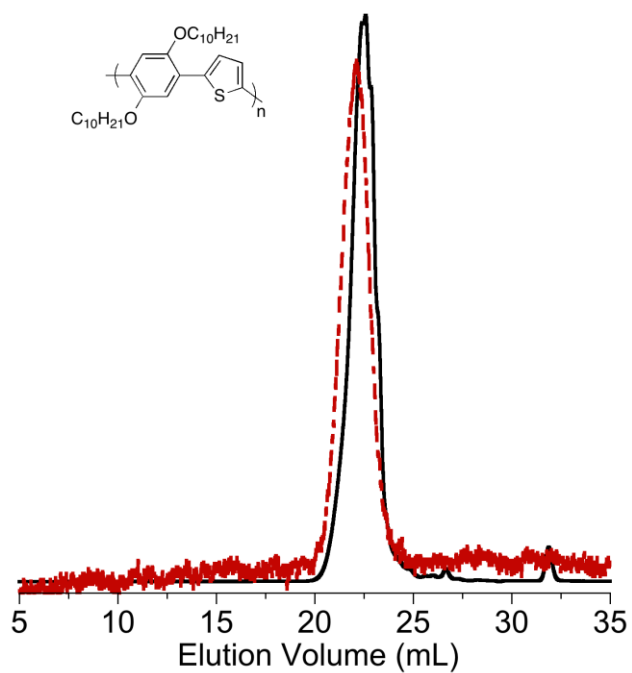

**Figure S 2.** GPC traces of **PPT** with UV detector (red dash) and refractive index detector (black solid).

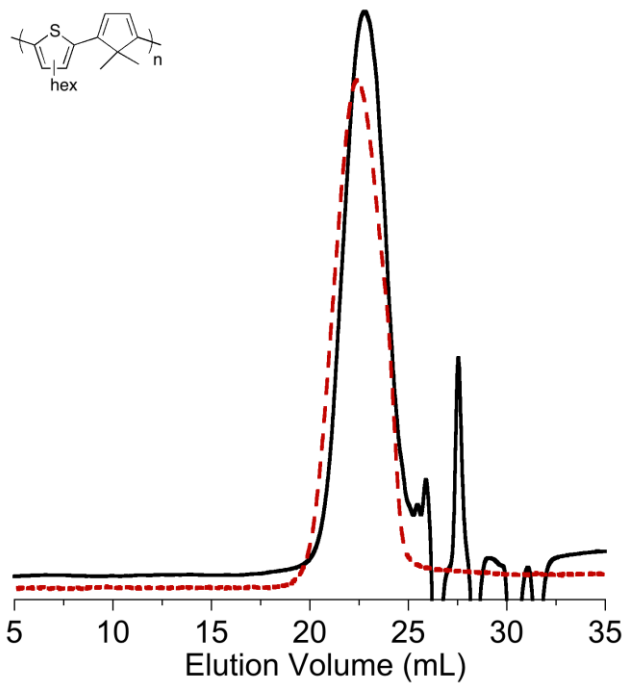

**Figure S 3.** GPC traces of **P3HTCp** with UV detector (red dash) and refractive index detector (black solid).

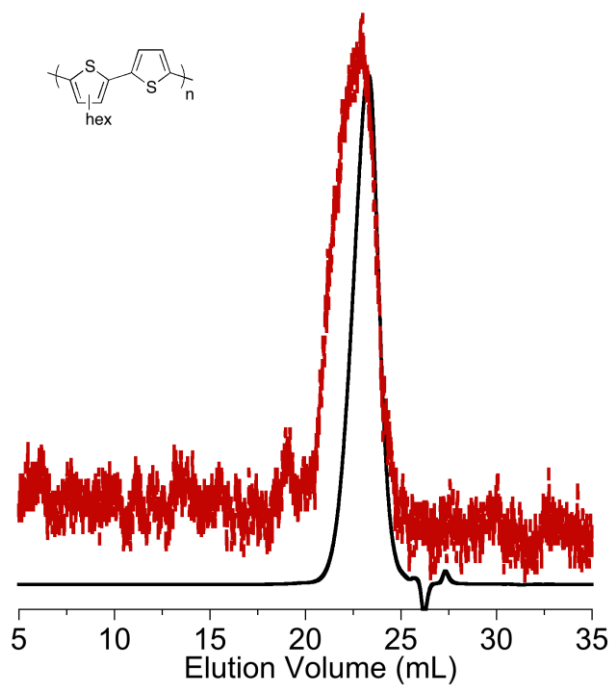

**Figure S 4.** GPC traces of **P3HTT** with UV detector (red dash) and refractive index detector (black solid).

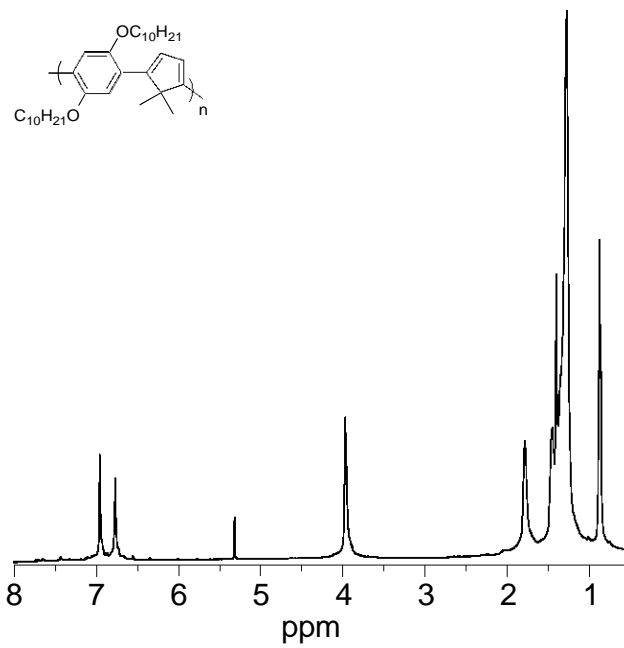

**Figure S 5.** <sup>1</sup>H NMR spectrum of **PPCp** (500 MHz, CD<sub>2</sub>Cl<sub>2</sub>).

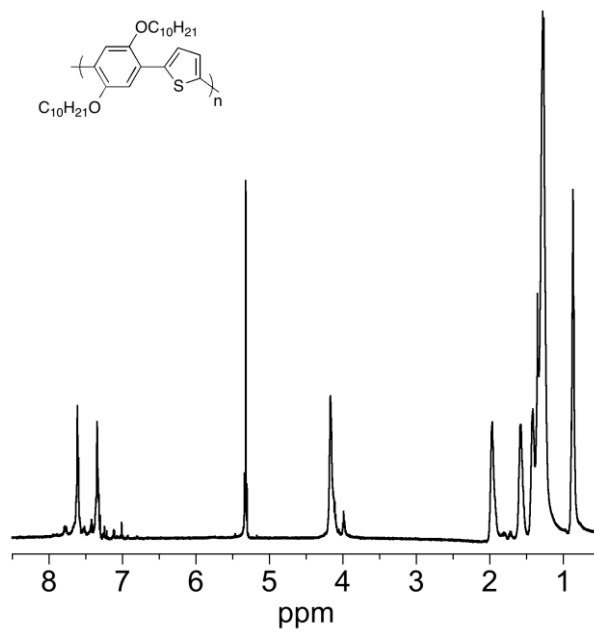

**Figure S 6.** <sup>1</sup>H NMR spectrum of **PPT** (500 MHz, CD<sub>2</sub>Cl<sub>2</sub>).

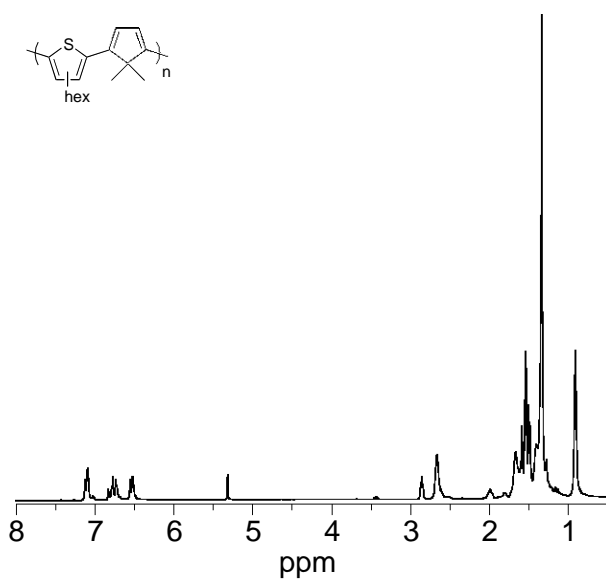

**Figure S 7.** <sup>1</sup>H NMR spectrum of **P3HTCp** (500 MHz, CD<sub>2</sub>Cl<sub>2</sub>).

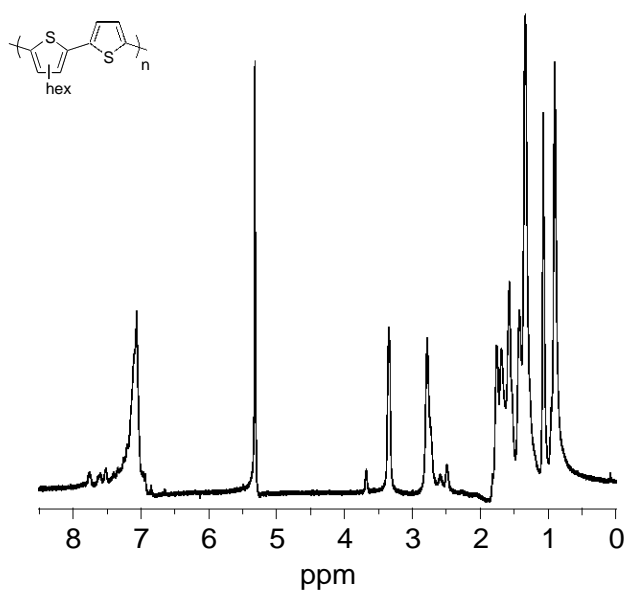

**Figure S 8.** <sup>1</sup>H NMR spectrum of **P3HTT** (500 MHz, CD<sub>2</sub>Cl<sub>2</sub>).

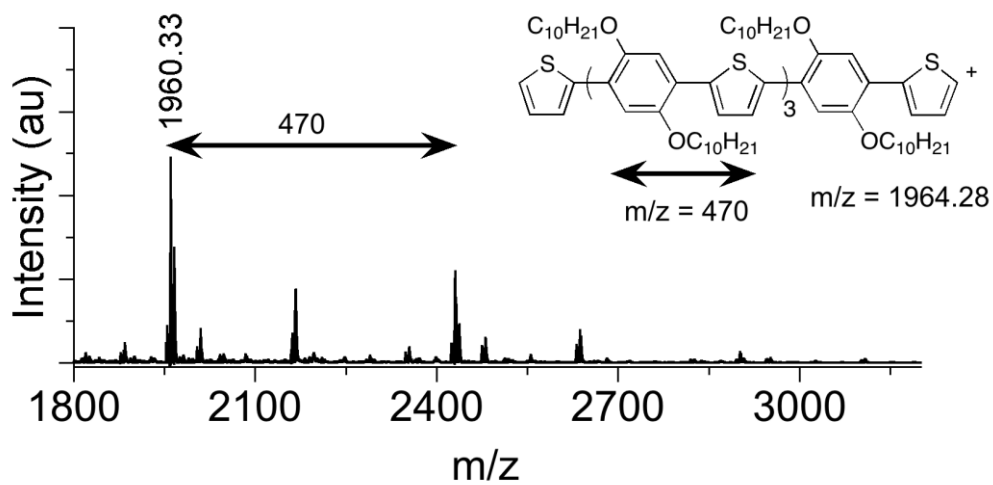

Figure S 9. MALDI-TOF mass spectrum of PPT.

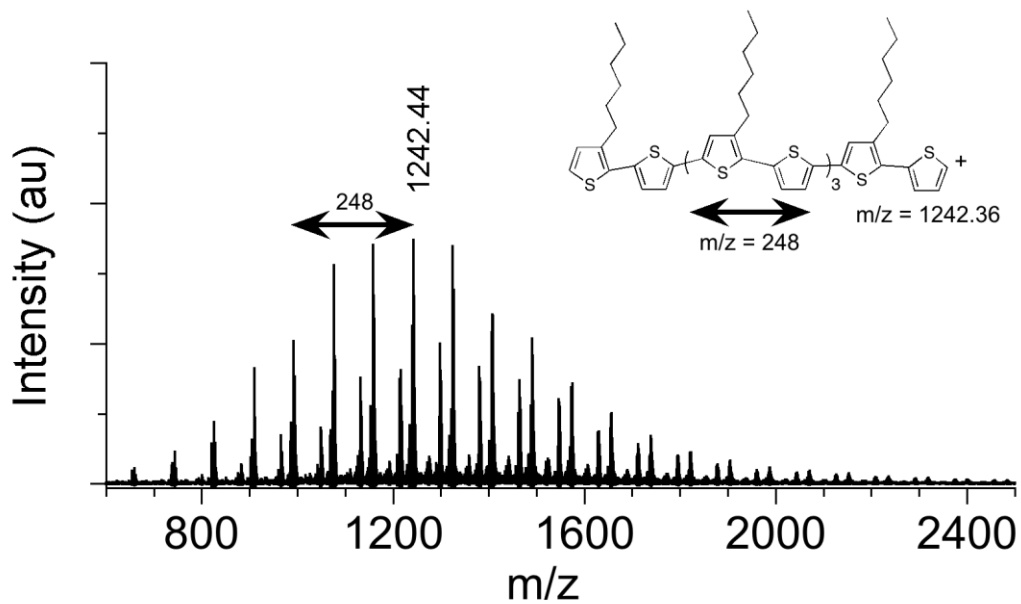

Figure S 10. MALDI-TOF mass spectrum of P3HTT.



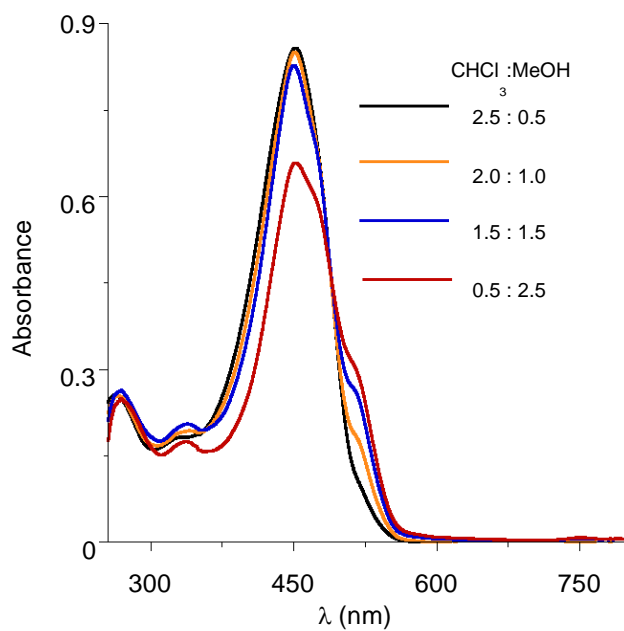

**Figure S 11.** UV/vis absorption spectra of **PPT** in  $\text{CHCl}_3/\text{MeOH}$  solvent mixtures.

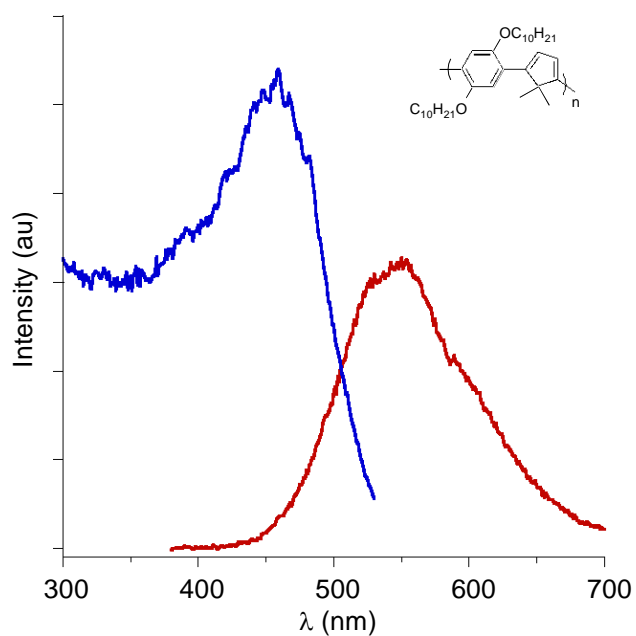

**Figure S 12.** Excitation (blue, em. @ 550 nm) and emission (red, exc. @ 365 nm) spectra of **PPCp**.

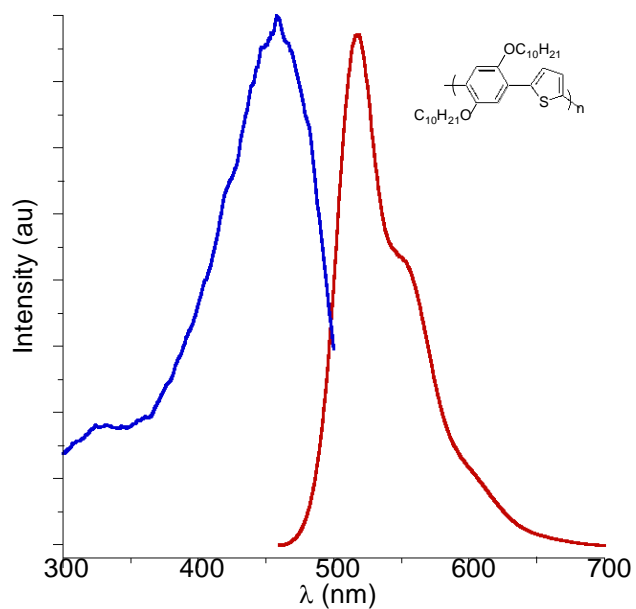

**Figure S 13.** Excitation (blue, em. @ 517 nm) and emission (red, exc. @ 454 nm) spectra of PPCp.

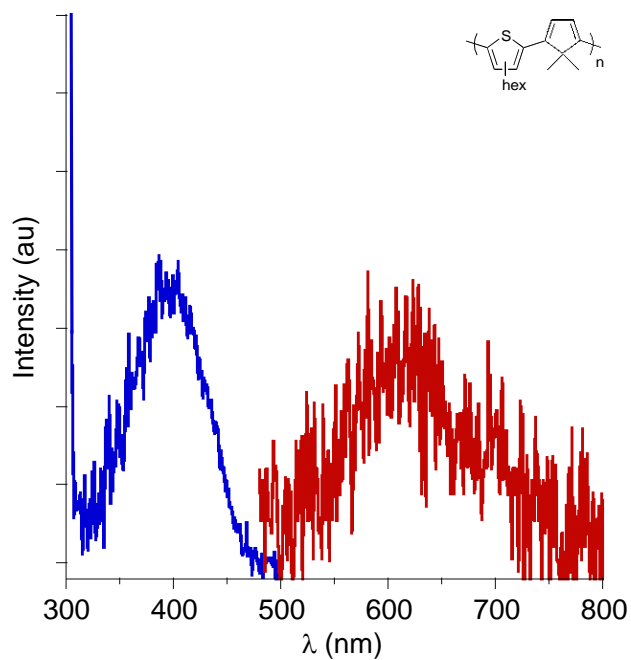

**Figure S 14.** Excitation (blue, em. @ ca. 600 nm) and emission (red, exc. @ ca. 476 nm) spectra of P3HTCp.

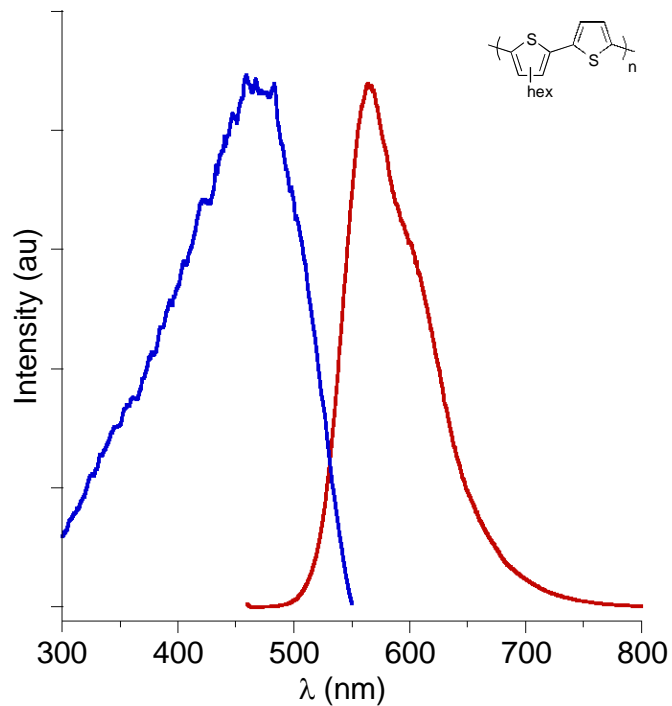

**Figure S 15.** Excitation (blue, em. @ *ca.* 564 nm) and emission (red, exc. @ *ca.* 457 nm) spectra of **P3HTCp**.

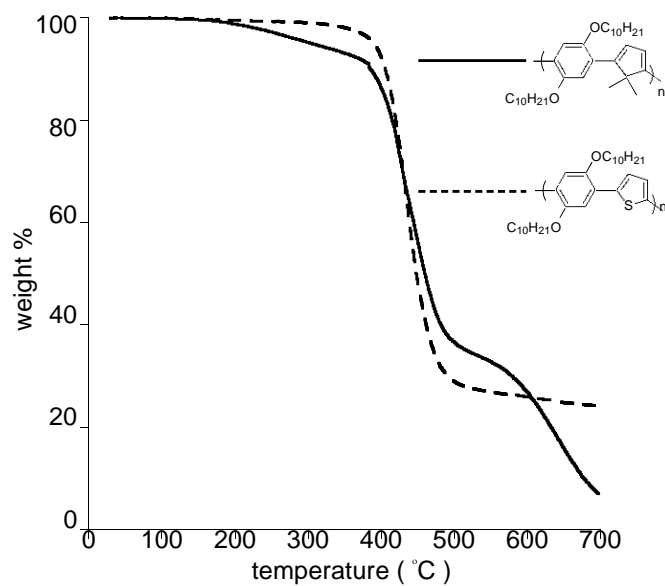

**Figure S 16.** TGA thermograms of **PPT** and **PPCp**.

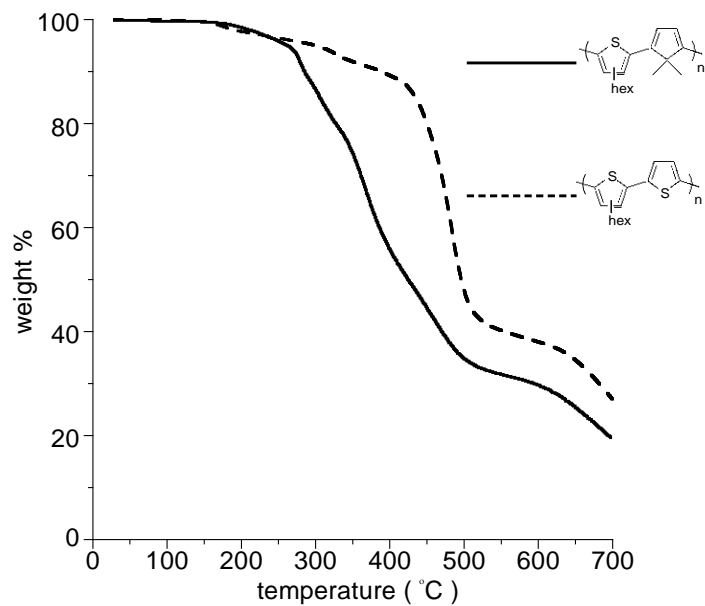

**Figure S 17.** TGA thermograms of **P3HTT** and **P3HTCp**.

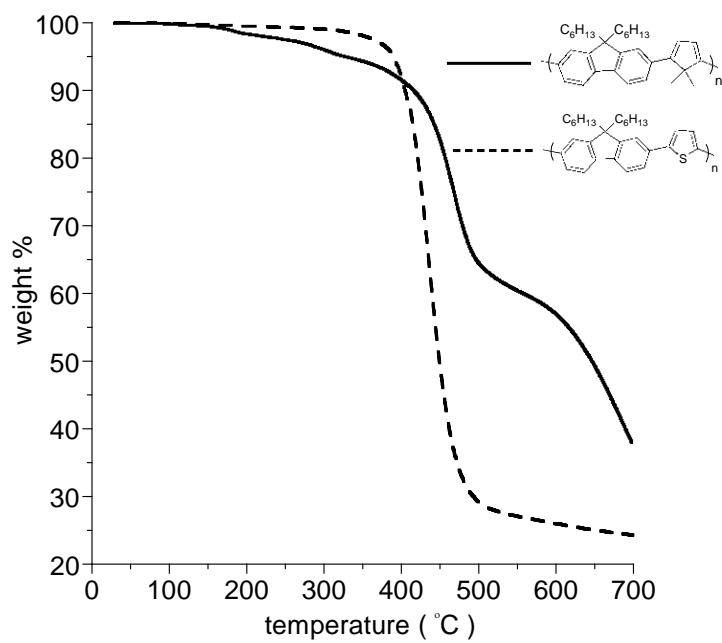

**Figure S 18.** TGA thermograms of **PFT** and **PFCp**.

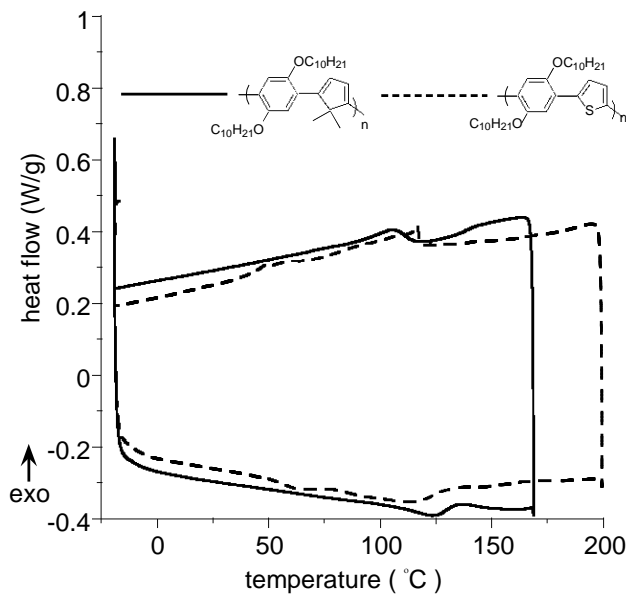

**Figure S 19.** DSC thermograms of **PPT** and **PPCp** (Scan rate 10°C/min, second heating and cooling curves).

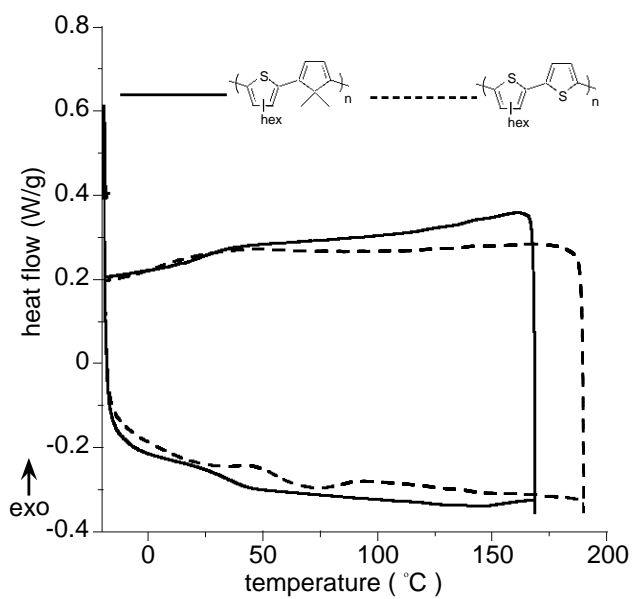

**Figure S 20.** DSC thermograms of **P3HTT** and **P3HTCp** (Scan rate 10°C/min, second heating and cooling curves).

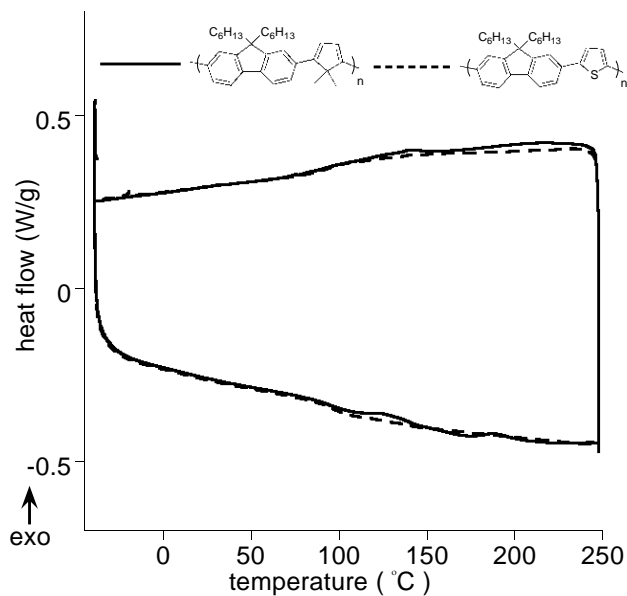

**Figure S 21.** DSC thermograms of **PFT** and **PFCp**. (Scan rate 10°C/min, second heating and cooling curves).

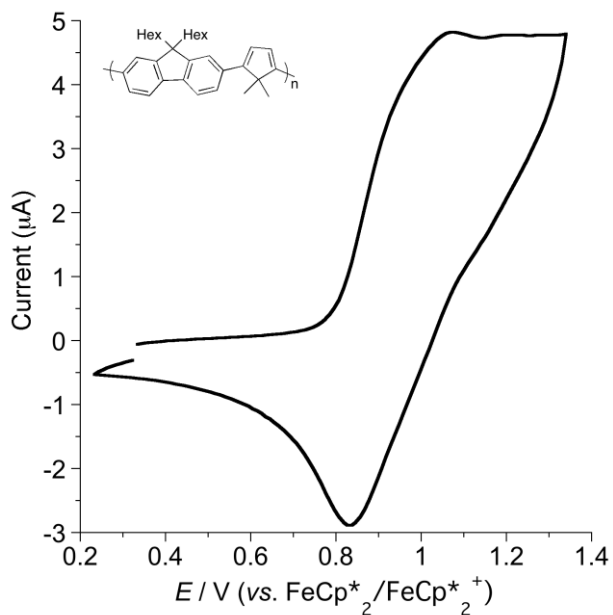

**Figure S 22.** Cyclic voltammogram of **PFCp** [5.6 mM (based on repeat unit Mw)]. Conditions: 0.1 M [*n*-Bu<sub>4</sub>N]PF<sub>6</sub> in DCM; scan rate, 100 mV/s, Pt disc working electrode, *E* vs. FeCp\*<sup>+</sup>/FeCp\*<sup>+</sup>.

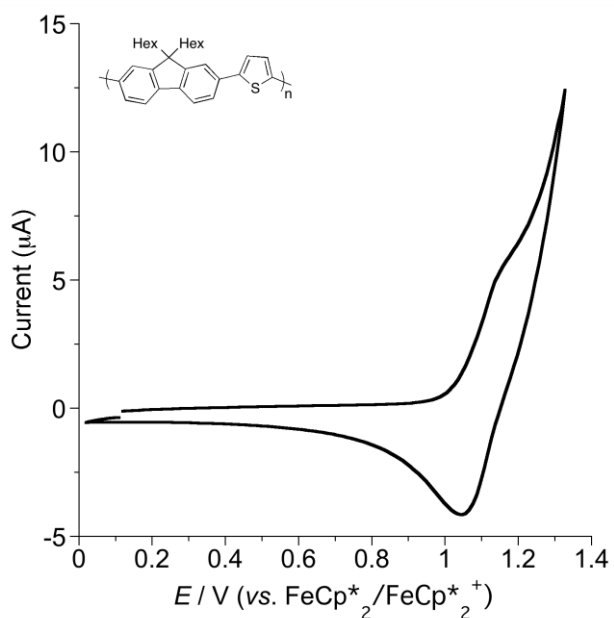

**Figure S 23.** Cyclic voltammogram of **PFT** [5.6 mM (based on repeat unit Mw)]. Conditions: 0.1 M  $[n\text{-Bu}_4\text{N}]\text{PF}_6$  in DCM; scan rate, 100 mV/s, Pt disc working electrode,  $E$  vs.  $\text{FeCp}^*/\text{FeCp}^{*\dagger}$ .

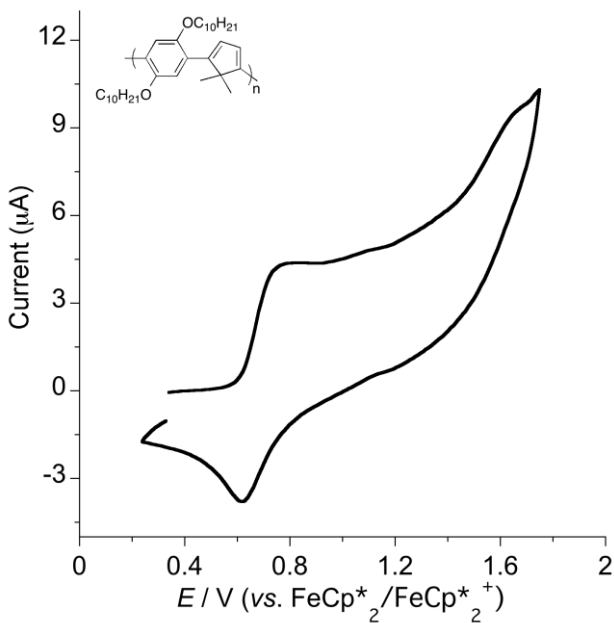

**Figure S 24.** Cyclic voltammogram of **PPCp** [5.6 mM (based on repeat unit Mw)]. Conditions: 0.1 M  $[n\text{-Bu}_4\text{N}]\text{PF}_6$  in DCM; scan rate, 100 mV/s, Pt disc working electrode,  $E$  vs.  $\text{FeCp}^*/\text{FeCp}^{*\dagger}$ .

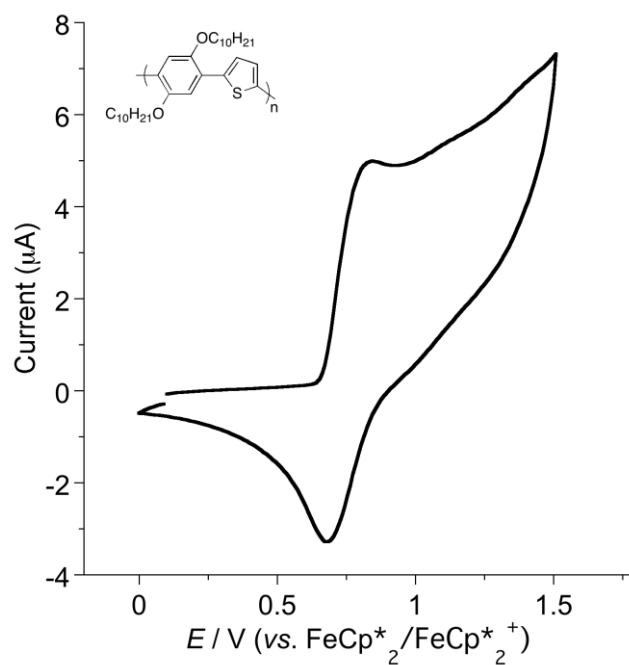

**Figure S 25.** Cyclic voltammogram of **PPT** [5.6 mM (based on repeat unit Mw)]. Conditions: 0.1 M [*n*-Bu<sub>4</sub>N]PF<sub>6</sub> in DCM; scan rate, 100 mV/s, Pt disc working electrode, *E* vs. FeCp\*<sup>2-</sup>/FeCp\*<sup>2+</sup>.

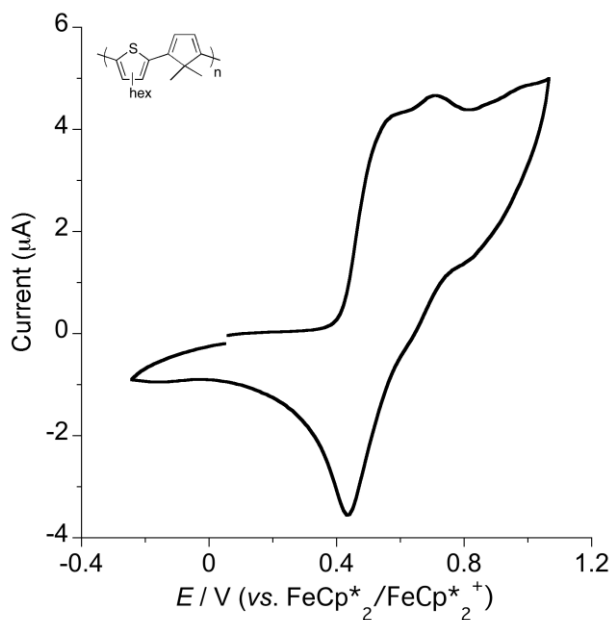

**Figure S 26.** Cyclic voltammogram of **P3HTCp** [5.6 mM (based on repeat unit Mw)]. Conditions: 0.1 M [*n*-Bu<sub>4</sub>N]PF<sub>6</sub> in DCM; scan rate, 100 mV/s, Pt disc working electrode, *E* vs. FeCp\*<sup>2-</sup>/FeCp\*<sup>2+</sup>.



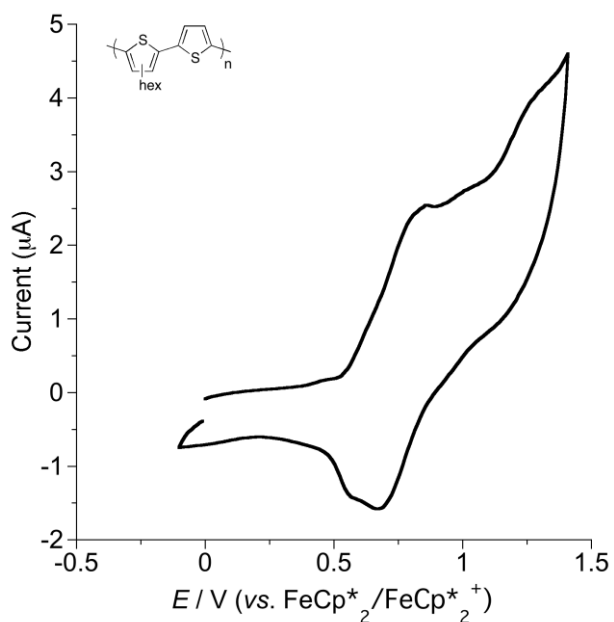

**Figure S 27.** Cyclic voltammogram of **P3HTT** [5.6 mM (based on repeat unit Mw)]. Conditions: 0.1 M  $[n\text{-Bu}_4\text{N}]\text{PF}_6$  in DCM; scan rate, 100 mV/s, Pt disc working electrode,  $E$  vs.  $\text{FeCp}^*/\text{FeCp}^{*+}$ .

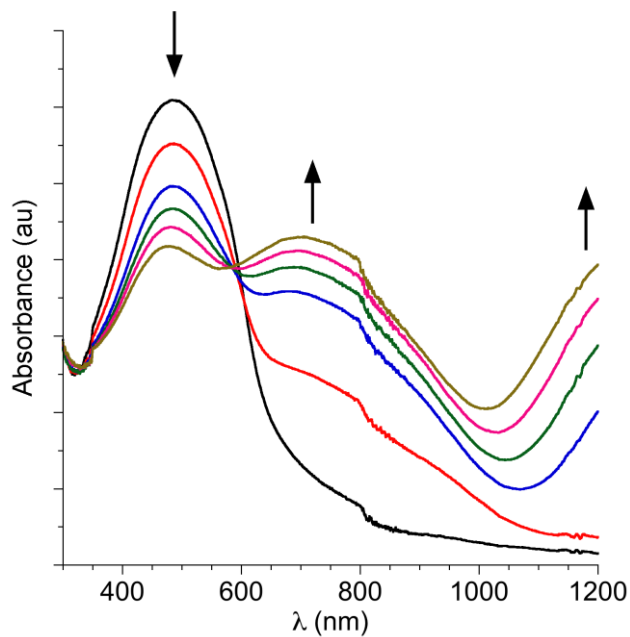

**Figure S 28.** Spectroelectrochemical profile of **P3HTT** between 0.80 and 1.00 V (vs  $\text{Ag}/\text{Ag}^+$ ). The black spectrum was obtained from a film in the neutral state. All subsequent spectra (*i.e.*, red, blue, green, pink, and brown) were taken at progressively higher potentials at 50 mV intervals.

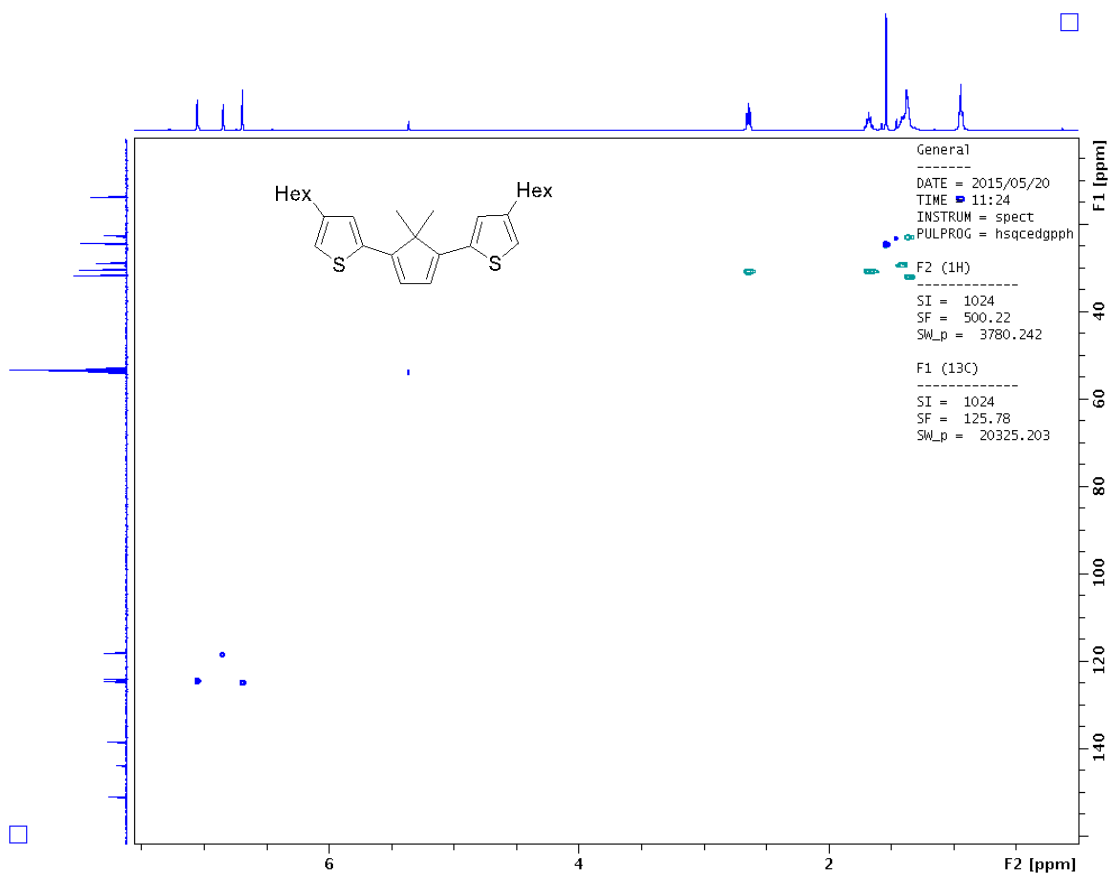

**Figure S 29.** HSQC spectrum of **3** (500 MHz, CD<sub>2</sub>Cl<sub>2</sub>).

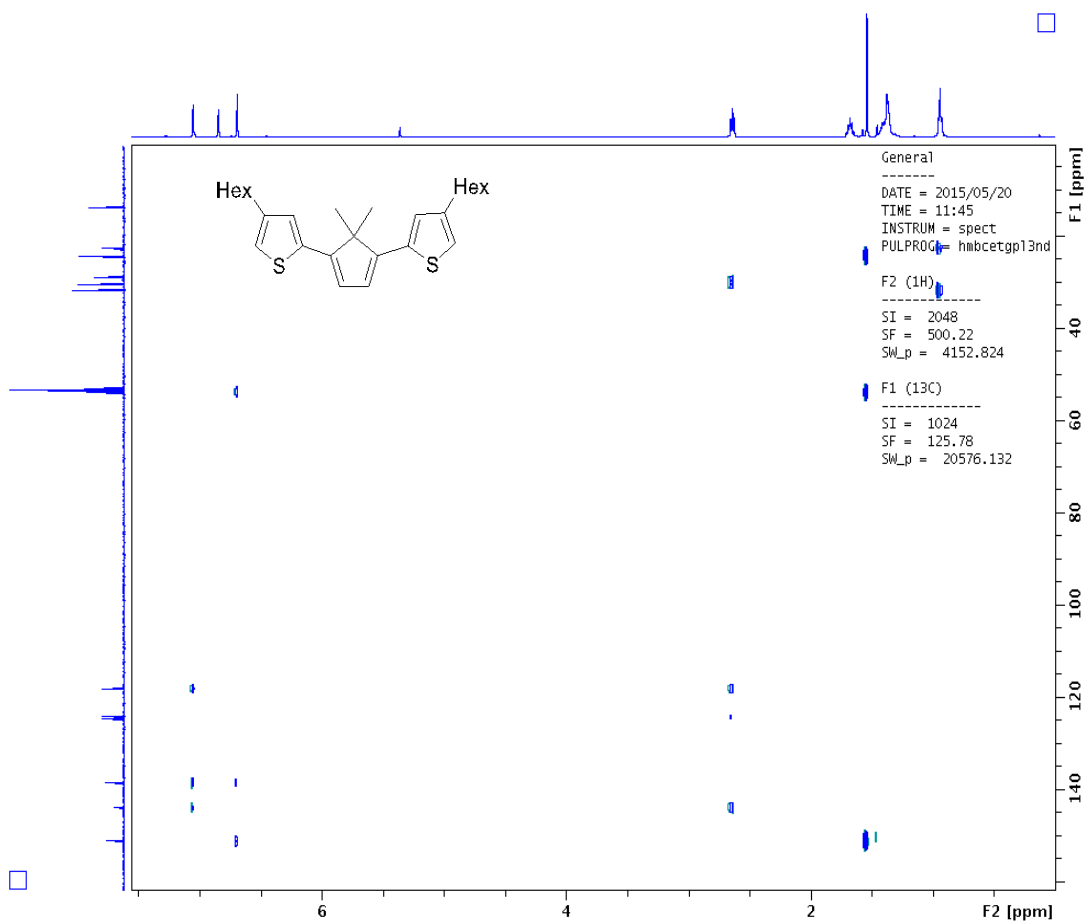

**Figure S 30.** HMBC spectrum of **3** (500 MHz, CD<sub>2</sub>Cl<sub>2</sub>).

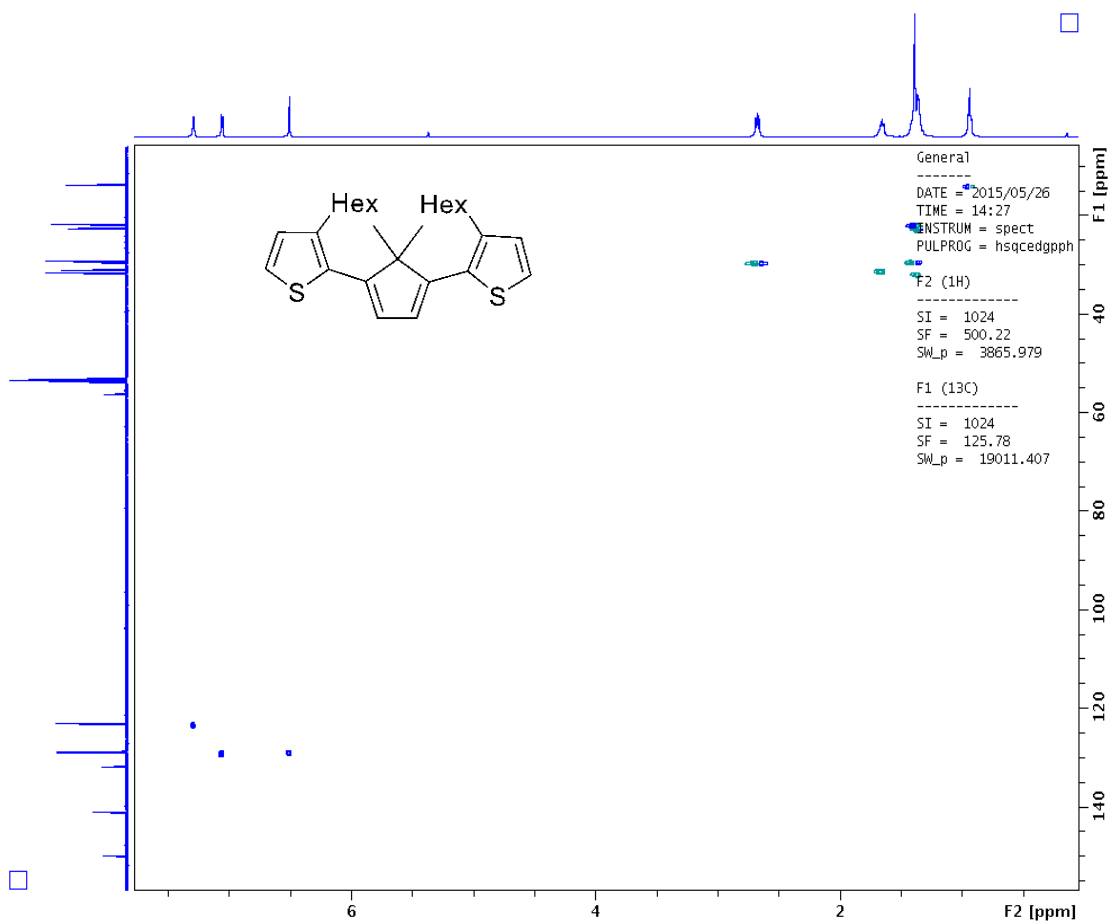

**Figure S 31.** HSQC spectrum of **4** (500 MHz, CD<sub>2</sub>Cl<sub>2</sub>).

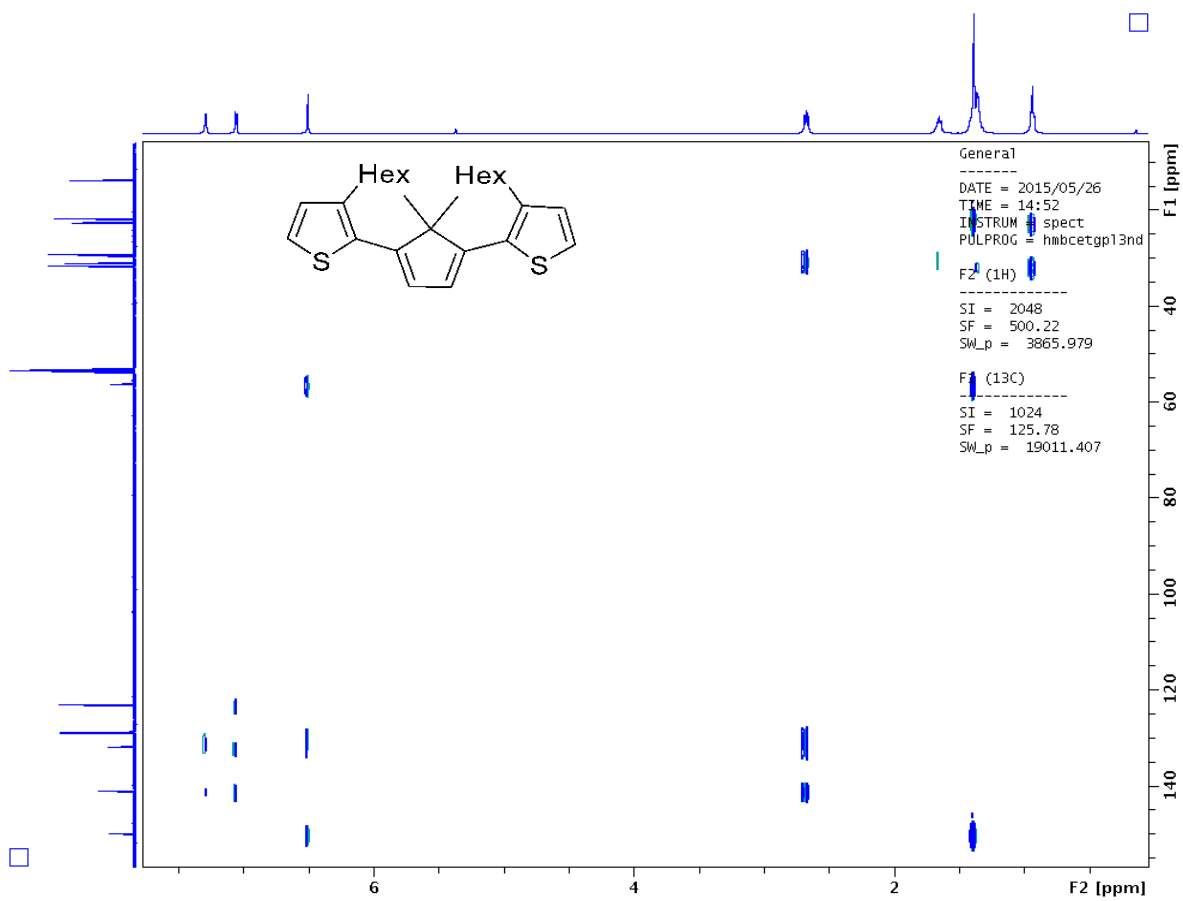

**Figure S 32.** HMBC spectrum of **4** (500 MHz, CD<sub>2</sub>Cl<sub>2</sub>).

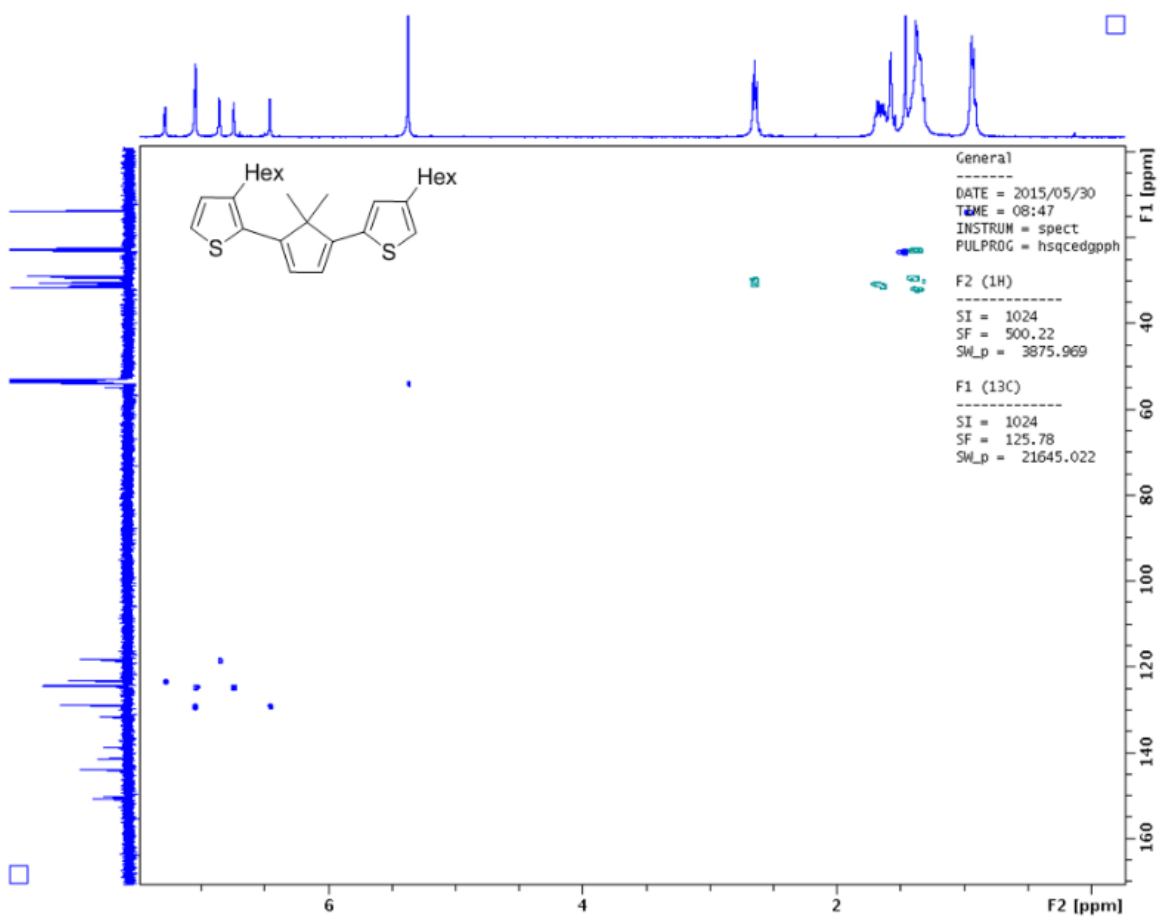

Figure S 33. HSQC spectrum of **5** (500 MHz,  $\text{CD}_2\text{Cl}_2$ ).

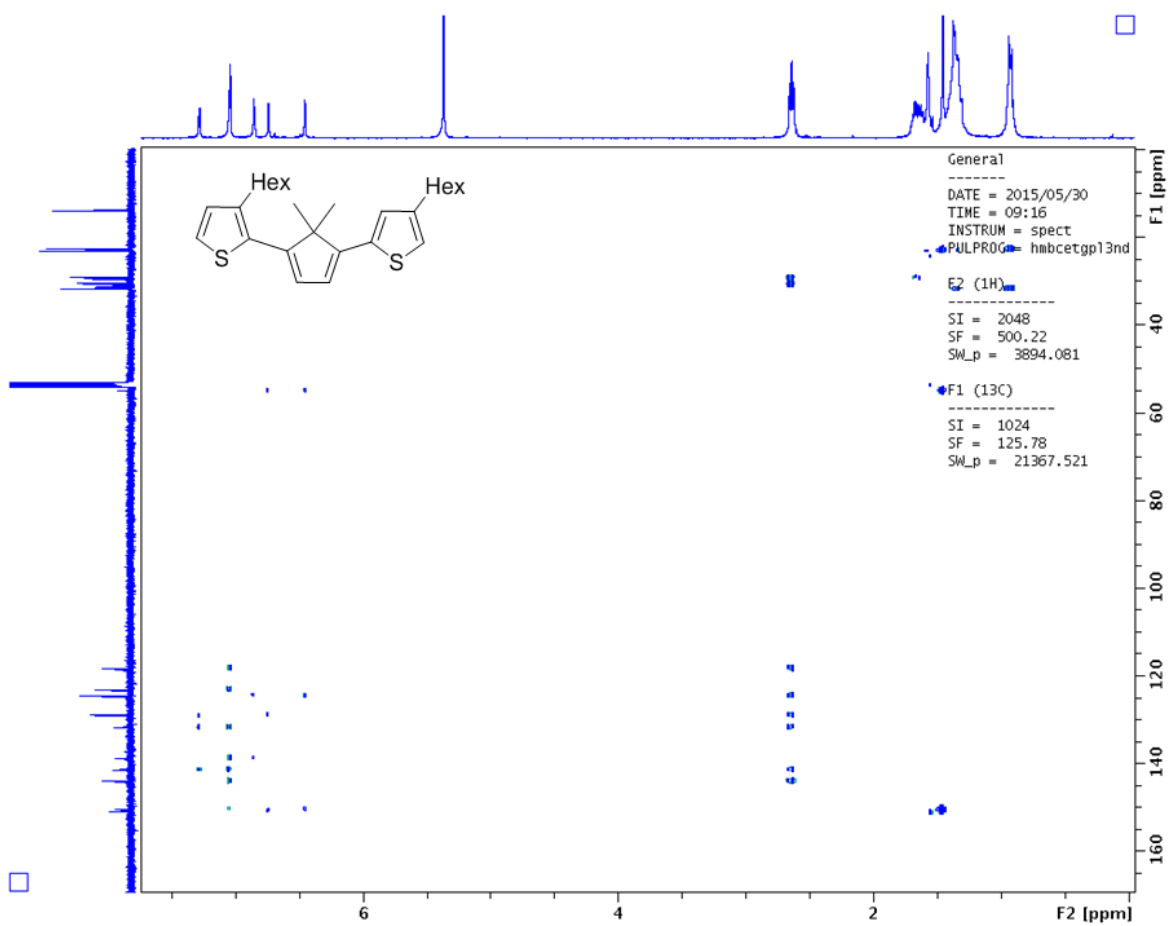

Figure S 34. HMBC spectrum of **4** (500 MHz, CD<sub>2</sub>Cl<sub>2</sub>).

**Device Fabrication and Characterization.** Electroluminescence spectra were collected from an ILT950 spectroradiometer (International Light Technologies) and luminance recorded with an ILT 1400-A photometer (International Light Technologies). Luminous intensity for **PFCp** was tested using a device architecture of Glass/ITO/PEDOT/**PFCp**/Alq<sub>3</sub>/LiF/Al. ITO was cleaned by sonication in water, acetone, and finally isopropyl alcohol before drying in a vacuum oven at 100°C for 30 minutes. Poly(3,4-ethylenedioxythiophene)-poly(styrenesulfonate) (PEDOT:PSS, Clevios<sup>TM</sup> P) was spin-coated at 4000 RPM and dried at 100°C for 30 minutes. **PFCp** was then spun from a DCM solution (10 mg/mL) at 2000 RPM. After drying, the device fabrication was completed by thermal evaporation of Alq<sub>3</sub>, LiF (*ca.* 1 nm) and Al (*ca.* 100 nm) through a shadow mask under vacuum at a base pressure of *ca.*  $5 \times 10^{-6}$  Torr at a rate of 0.05 nm/s. The overlap between ITO and Al electrodes was 3 mm x 3 mm as the active emissive area of the device. The Current-Voltage (IV) characteristics were measured using a Keithley 236 source-measurement unit.
